# Supplementary material for: Spitzenkörper assembly mechanisms reveal conserved features of fungal and metazoan polarity scaffolds
Source: PubMed Central journal article supplement (PMC7275032; doi:10.1038/s41467-020-16712-9), 2020-06-05
Supplement: 41467_2020_16712_MOESM1_ESM.pdf [file 41467_2020_16712_MOESM1_ESM.pdf]

## Supplementary Information

### **Spitzenkörper assembly mechanisms reveal conserved features of fungal and metazoan polarity scaffolds**

Zheng et al.

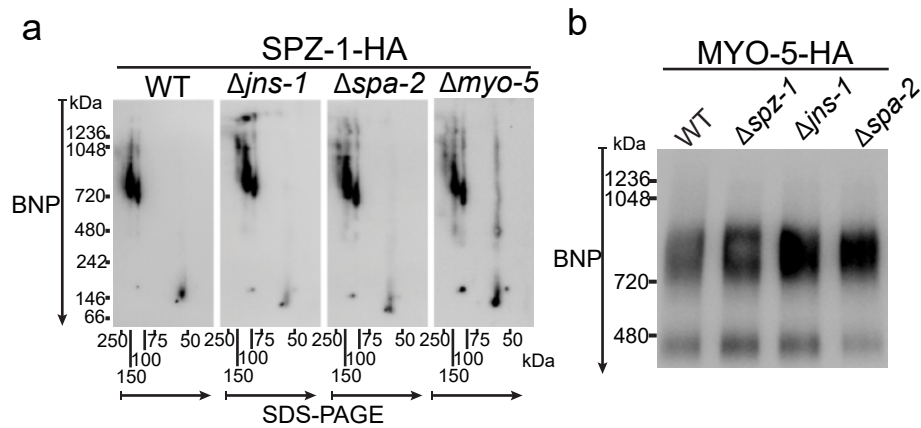

**Supplementary Figure 1. SPZ-1 and MYO-5 migration in native-PAGE.** **a** Extracts from the indicated strains were separated by blue native-PAGE (BNP), followed by second dimension SDS-PAGE. SPZ-1 is revealed by western against the HA-epitope tag. **b** Extracts from the indicated strains were separated by native-PAGE. MYO-5 is revealed by western against the HA-epitope tag. The direction of protein migration is indicated with arrows. Source data are provided as a Source Data file.

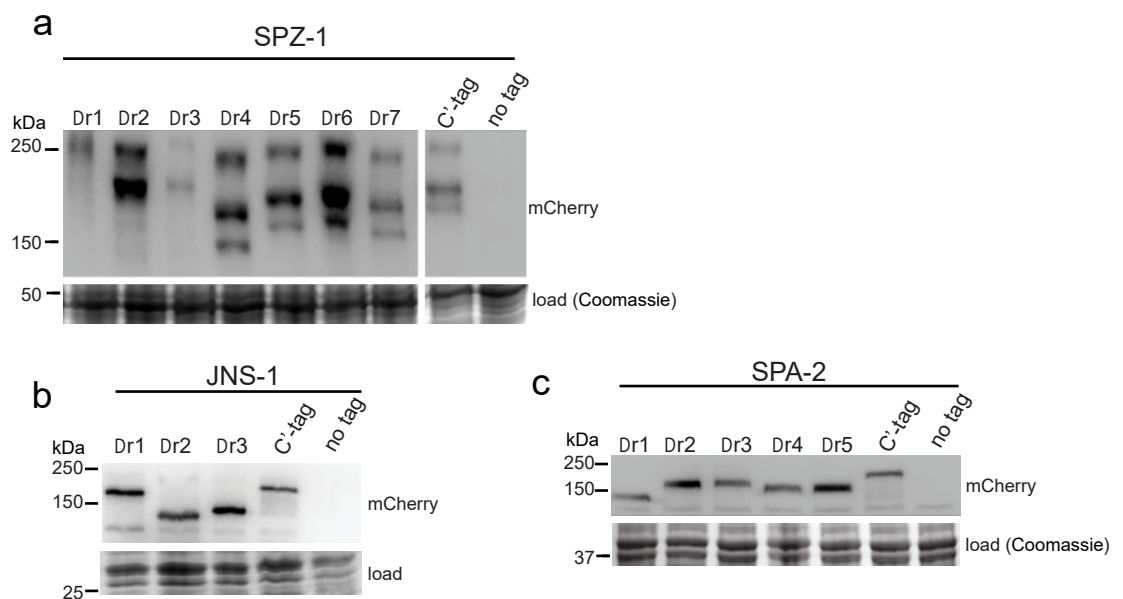

**Supplementary Figure 2. Steady-state protein levels for deletion variants.** **a** The anti-mCherry western blot reveals steady-state levels of the indicated deletion variants of SPZ-1. **b** The anti-mCherry western blot reveals steady-state levels of the indicated deletion variants of JNS-1. **c** The anti-mCherry western blot reveals steady-state levels of the indicated deletion variants of SPA-2. A region of a Coomassie stained gel provides a loading control (load). Source data are provided as a Source Data file.

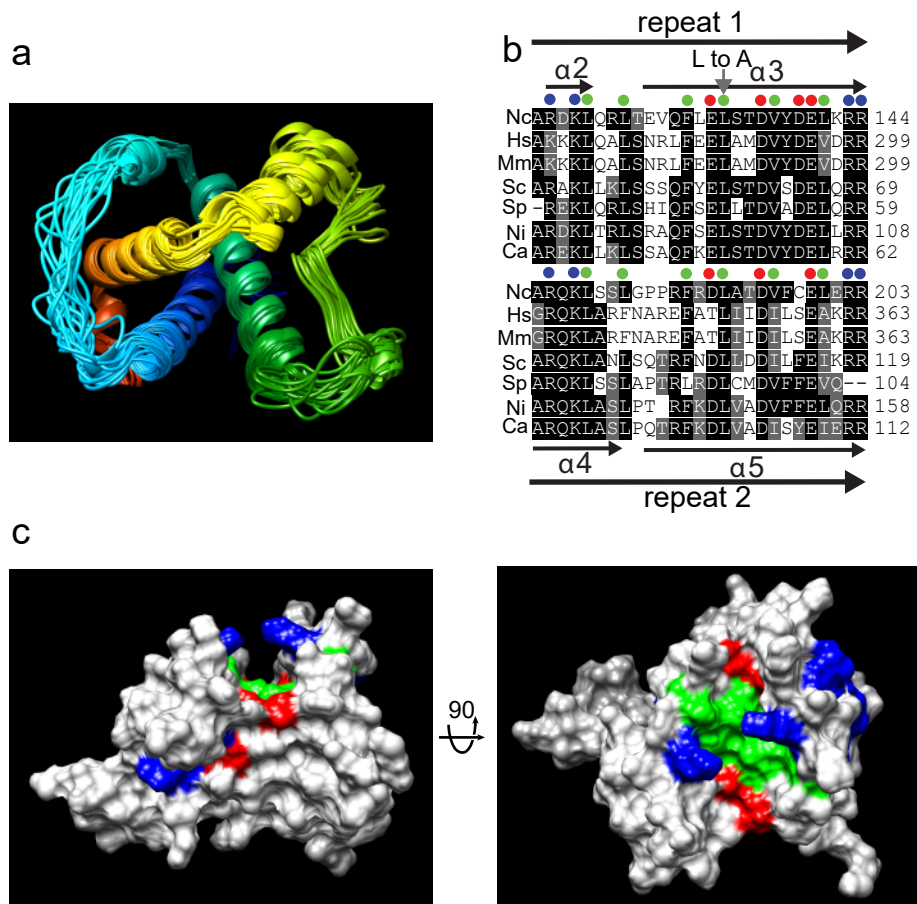

**Supplementary Figure 3. Conserved SHD (Spa homology domain) residues map to the SHD surface groove.** **a** Superimposition of 20 SHD low-energy conformations determined by NMR. **b** SHD repeat 1 and 2 are aligned and conserved residues are labelled according to their biophysical character. Basic residues are blue, acidic residues are red, and hydrophobic residues are green. **c** A surface representation of the SHD is shown with conserved residues coloured according to **b**. The perspective of the two panels are the same as shown in Figure 4b and Figure 4c.

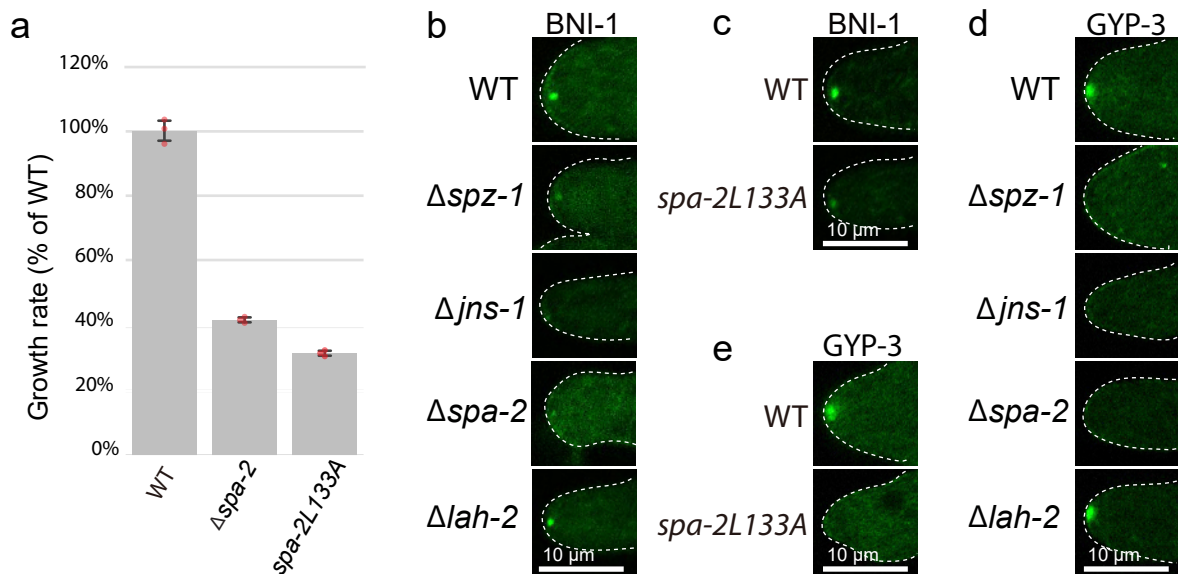

**Supplementary Figure 4. Figures related to Figure 4 and 6. a** Full loss of function of SPA-2 SHD L133A mutant. For the indicated strains, the average growth rate is shown as mean values  $\pm$  SD ( $n = 3$  independent measurements). **b** BNI-1 partially depends on SPZ-1, JNS-1 and SPA-2, but not LAH-2. Scale bar = 10  $\mu m$ . **c** BNI-1 is partially delocalized in the *spa-2L133A* mutant. Scale bar = 10  $\mu m$ . **d** GYP-3 depends on SPZ-1, JNS-1 and SPA-2, but not LAH-2. Scale bar = 10  $\mu m$ . **e** GYP-3 is delocalized in the *spa-2L133A* mutant. Scale bar = 10  $\mu m$ . Source data are provided as a Source Data file.

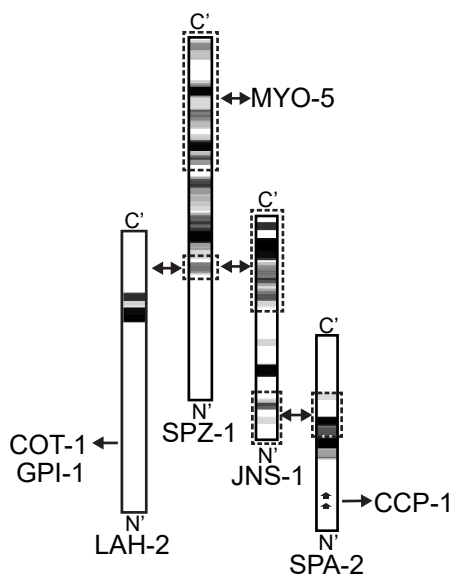

**Supplementary Figure 5. Scaffolds are assembled primarily through coiled-coil domains.** Coiled coil dimer probability is shown for SPZ-1, JNS-1, SPA-2 and LAH-2. Dashed boxes and arrows indicate regions shown to be required for the indicated interactions.

a

|      | overall e-value | Domain conditional e-value |          |
|------|-----------------|----------------------------|----------|
|      |                 | SHD                        | CTD      |
| GIT2 | 7.20E-18        | 3.50E-14                   | 3.60E-05 |
| GIT1 | 2.90E-17        | 1.60E-16                   | 4.30E-03 |

b

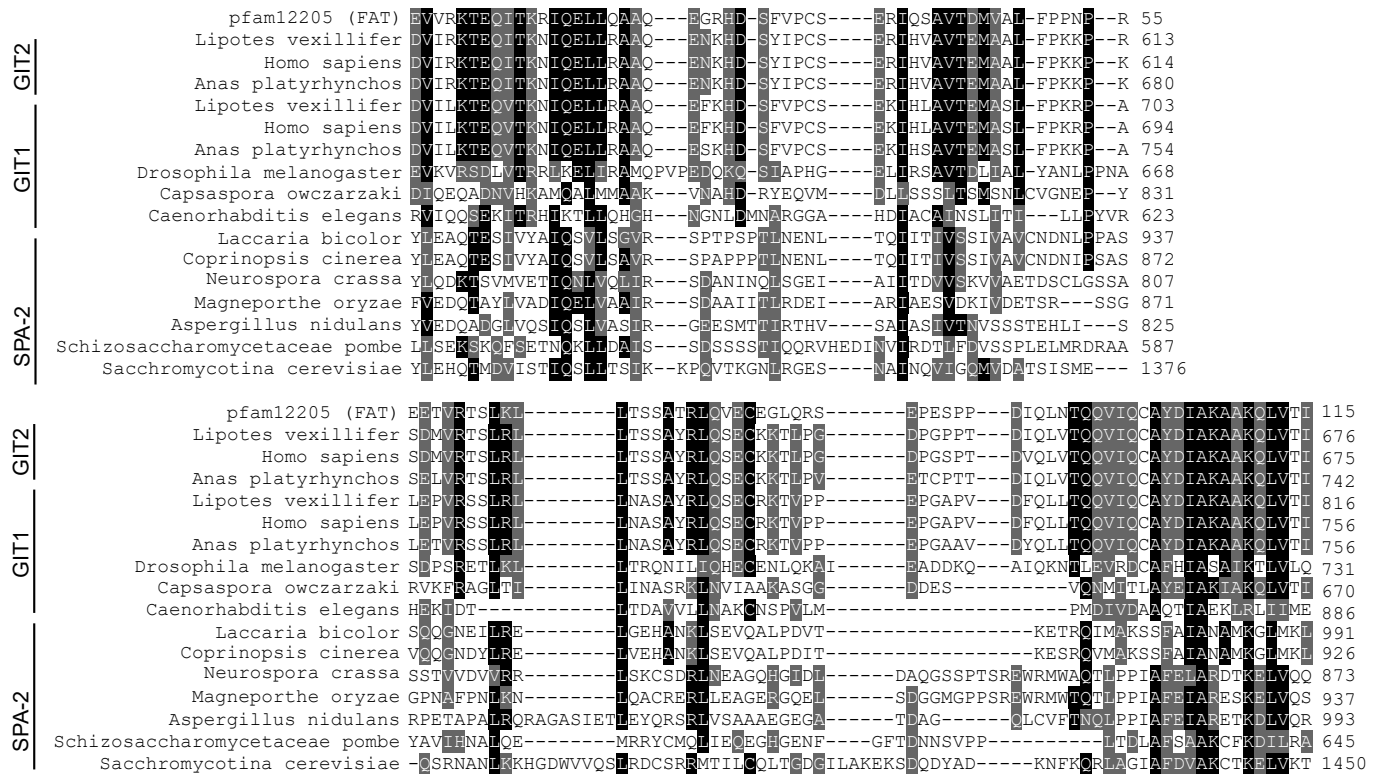

**Supplementary Figure 6. Alignment of C-terminal domains of GIT and SPA-2 with the consensus FAT domain (pfam12205).** a SPA-2 hmm profiles for the SHD and C-terminal domain (CTD) were constructed from the alignment of Pezizomycotina sequences were used to query the human proteome. The GIT-1 and GIT-2 SHD and FAT domain are identified as significant hits. E-values are shown. b Alignment of representative fungal SPA-2 and metazoan C-terminal domains with the pfam12205 FAT domain. Source data are provided as a Source Data file. Identical residues are shaded black, while conserved residues are labeled gray. Numbering corresponds to the full-length proteins.

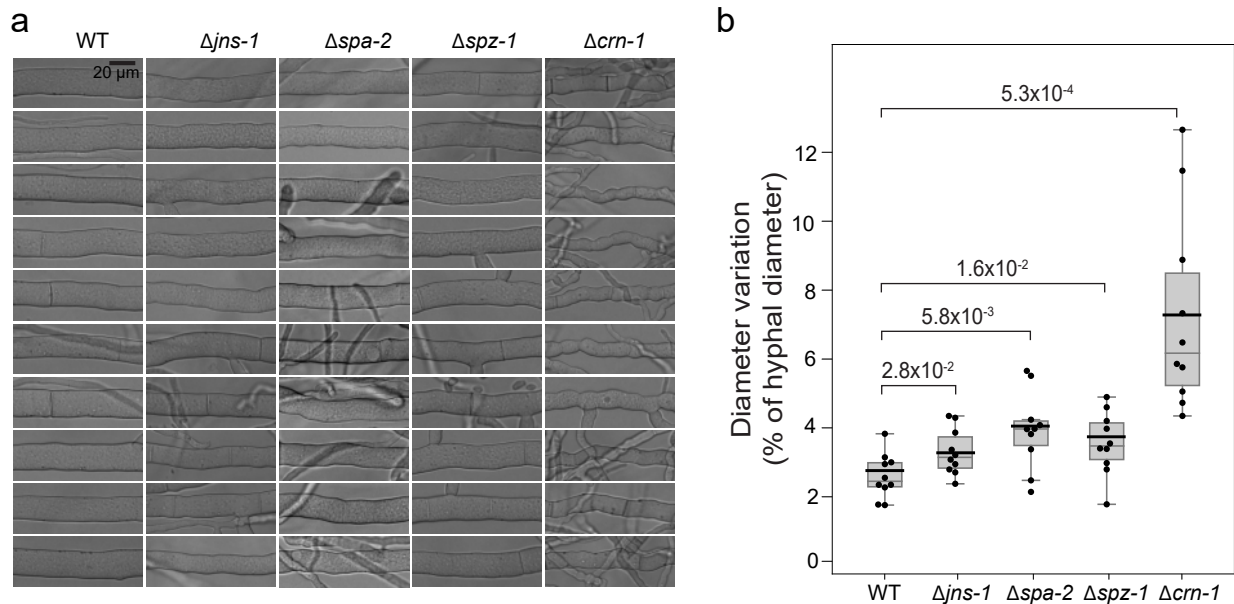

**Supplementary Figure 7. *Spz-1*, *jns-1* and *spa-2* deletion mutants do not exhibit major defects in hyphal morphology.** **a** Morphology of representative primary hyphae in the indicated strains. The *crn-1* deletion mutant, which is a known morphological mutant, is used as a positive control. Scale bar = 20  $\mu$ m. **b** Boxplot showing variation in hyphal diameter quantified from images as shown in **a**. Each data point represents the standard deviation in diameter of one hypha. (median values  $\pm$  SD, n= 10 independent hyphae). The lower and upper boundaries of each box indicate the first and third quartile, respectively. The whiskers indicate the expected minimum (median - 1.5\* interquartile range) and maximum (median + 1.5 \* interquartile range). Horizontal black bars indicate the average standard deviation in each group. The p-value of Student's t-test (2 tailed) comparing each mutant to the wild type strain is shown. Source data are provided as a Source Data file.

**Supplementary Table 1 (related to Figure 1): Maxquant intensity from co-IP experiments**

| IP target       | <b>SPZ-1</b> | <b>MYO-5</b> | <b>JNS-1</b> | <b>SPA-2</b> | <b>LAH-2</b> |
|-----------------|--------------|--------------|--------------|--------------|--------------|
| <b>SPZ-1-HA</b> | 440740       | 431110       | 131500       | 242960       | 251350       |
| <b>MYO-5-HA</b> | 673870       | 899100       | 105460       | 256710       | 119380       |
| <b>JNS-1-HA</b> | 37052        | 781.77       | 199590       | 869310       | 0            |
| <b>SPA-2-HA</b> | 247570       | 69865        | 567220       | 957620       | 5198.8       |
| <b>LAH-2-HA</b> | 11720        | 0            | 0            | 0            | 20200        |

Column 1 identifies the IP target. The mass spectrometry maxquant intensity is given for the indicated proteins.

**Supplementary Table 2 (related to Figure 4):  
Restraints used and structural statistics for the final 20 conformers of SHD<sup>a</sup>**

|                                                                                            |               |
|--------------------------------------------------------------------------------------------|---------------|
| Distance restraints                                                                        |               |
| Intra-residue (i-j = 0)                                                                    | 340           |
| Sequential ( i-j  = 1)                                                                     | 422           |
| Medium range (2 ≤  i-j  < 4)                                                               | 193           |
| Long range ( i-j  ≥ 4)                                                                     | 212           |
| Hydrogen bond                                                                              | 110           |
| Total                                                                                      | 1277          |
| Dihedral angle restraints (ϕ, ψ)                                                           | 178           |
| Average rmsd to the mean structure (Å) <sup>b</sup>                                        |               |
| Backbone atoms                                                                             | 0.90 ± 0.26   |
| Heavy atoms                                                                                | 1.50 ± 0.25   |
| ϕ/ψ space <sup>c</sup>                                                                     |               |
| Most favored region (%)                                                                    | 94.3          |
| Additionally allowed region (%)                                                            | 4.9           |
| Generously allowed region (%)                                                              | 0.7           |
| Disallowed region (%)                                                                      | 0.1           |
| rmsd from covalent geometry                                                                |               |
| Bonds (Å)                                                                                  | 0.006 ± 0.000 |
| Angles (deg.)                                                                              | 0.794 ± 0.006 |
| Impropers (deg.)                                                                           | 0.405 ± 0.010 |
| rmsd from experimental restraints                                                          |               |
| NOEs (Å)                                                                                   | 0.047 ± 0.002 |
| Dihedral (deg.)                                                                            | 0.162 ± 0.058 |
| eefx potential energy (kcal)                                                               | -1957 ± 21.41 |
| <sup>a</sup> Selected from 100 calculated conformers according to overall energy.          |               |
| <sup>b</sup> Calculated with MOLMOL (1) using range 6-21, 45-66, 90-101, 104-121, 124-127. |               |
| <sup>c</sup> Calculated with PROCHECK-NMR (2).                                             |               |



**Supplementary Table 3 (related to Figure 7):**

| Proteomes used in phylogenetic analyses |                         |                  |
|-----------------------------------------|-------------------------|------------------|
| <b>Species</b>                          | <b>Taxon</b>            | <b>Reference</b> |
| <i>Neurospora crassa</i>                | Pezizomycotina          | 3                |
| <i>Magnaporthe oryzae</i>               |                         | 4                |
| <i>Fusarium oxysporum</i>               |                         | 5                |
| <i>Sclerotinia sclerotiorum</i>         |                         | 3                |
| <i>Aspergillus fumigatus</i>            |                         | 6                |
| <i>Tuber melanosporum</i>               |                         | 7                |
| <i>Candida albicans</i>                 |                         | Saccharomycotina |
| <i>Candida glabrata</i>                 | 8                       |                  |
| <i>Saccharomyces cerevisiae</i>         | 9                       |                  |
| <i>Yarrowia lipolytica</i>              | 8                       |                  |
| <i>Schizosaccharomyces pombe</i>        | Taphrinomycotina        | 10               |
| <i>Saitoella complicata</i>             |                         | 10               |
| <i>Sporobolomyces roseus</i>            | Basidiomycota           | 10               |
| <i>Ustilago maydis</i>                  |                         | 12               |
| <i>Cryptococcus neoformans</i>          |                         | 13               |
| <i>Coprinopsis cinerea</i>              | Agaricomycotina         | 14               |
| <i>Laccaria bicolor</i>                 |                         | 15               |
| <i>Allomyces macrogynus</i>             | Fungi (early diverging) | 3                |
| <i>Rhizopus oryzae</i>                  |                         | 16               |
| <i>Homo sapiens</i>                     | Metazoan                | 17               |
| <i>Arabidopsis thaliana</i>             | Plant                   | 18               |

## Supplementary References

1. Koradi, R., Billeter, M. & Wüthrich, K. MOLMOL: A program for display and analysis of macromolecular structures. *J. Mol. Graph.* **14**, 51–55 (1996).
2. Laskowski, R. A., Rullmann, J. A. C., MacArthur, M. W., Kaptein, R. & Thornton, J. M. AQUA and PROCHECK-NMR: Programs for checking the quality of protein structures solved by NMR. *J. Biomol. NMR* **8**, 477–486 (1996).
3. Broad Institute. Available at: <https://www.broadinstitute.org/>.
4. Dean, R. A. *et al.* The genome sequence of the rice blast fungus *Magnaporthe grisea*. **434**, (2005).
5. Ma, L. J., van der Does, H. C., Borkovich, K. a & Al, E. Comparative analysis reveals mobile pathogenicity chromosomes in *Fusarium*. *Nature* **464**, 367–373 (2010).
6. Nierman, W. *et al.* Genomic sequence of the pathogenic and allergenic filamentous fungus *Aspergillus fumigatus*. *Nature* **438**, 1151–6 (2005).
7. Martin, F. *et al.* Périgord black truffle genome uncovers evolutionary origins and mechanisms of symbiosis. *Nature* **464**, 1033–8 (2010).
8. Dujon, B. *et al.* Genome evolution in yeasts. *Nature* **430**, 35–44 (2004).
9. Goffeau, A. *et al.* Life with 6000 Genes. *Science (80-. )*. **274**, 546–567 (1996).
10. Wood, V. *et al.* PomBase: A comprehensive online resource for fission yeast. *Nucleic Acids Res.* **40**, 695–699 (2012).
11. Joint Genome Institute. Available at: <http://http//genome.jgi.doe.gov/>.
12. Kämper, J. *et al.* Insights from the genome of the biotrophic fungal plant pathogen *Ustilago maydis*. *Nature* **444**, 97–101 (2006).
13. Loftus, B. J. *et al.* The Genome of the Basidiomycetous Yeast and Human Pathogen *Cryptococcus neoformans*. *Science (80-. )*. **307**, 1321–1324 (2005).
14. Stajich, J. E. *et al.* Insights into evolution of multicellular fungi from the assembled chromosomes of the mushroom *Coprinopsis cinerea* ( *Coprinus cinereus* ). *Pnas* **107**, 11889–11894 (2010).
15. Martin, F. *et al.* The genome of *Laccaria bicolor* provides insights into mycorrhizal symbiosis. *Nature* **452**, 88–92 (2008).
16. Ma, L. J. *et al.* Genomic analysis of the basal lineage fungus *Rhizopus oryzae* reveals a whole-genome duplication. *PLoS Genet.* **5**, (2009).
17. Lander, E. S. *et al.* Initial sequencing and analysis of the human genome. *Nature* **409**, 860–921 (2001).
18. The Arabidopsis Genome Initiative. Analysis of the genome sequence of the flowering plant *Arabidopsis thaliana*. *Nature* **408**, 796–815 (2000).
